# Supplementary material for: Effects of Risk-Based Firearm Seizure Laws in Connecticut and Indiana on Suicide Rates, 1981–2015
Source: Atypon-hosted journal article supplement (doi:10.1176/appi.ps.201700250), 2018-06-01
Supplement: appi.ps.201700250.ds001.pdf [file appi.ps.201700250.ds001.pdf]

 


Psychiatry Online
